# Supplementary material for: Preparation of a drug-eluting stent using a TiO2 film deposited by plasma enhanced chemical vapour deposition as a drug-combining matrix
Source: Royal Society of Chemistry journal article supplement (doi:10.1039/b925409a), 2010-01-01
Supplement: b925409a.pdf [file b925409a.pdf]

## **Preparation of a Drug-eluting Stent Using a TiO<sub>2</sub> Film Deposited by Plasma Enhanced Chemical Vapour Deposition as a Drug-combining Matrix**

**Sun-Jung Song<sup>1</sup>, Yu Jeong Park<sup>1</sup>, Jun Park<sup>1</sup>, Myung Duck Cho<sup>1</sup>, Jong-Ho Kim<sup>2</sup>, Myung  
Ho Jeong<sup>3</sup>, Yong Sook Kim<sup>3</sup>, Dong Lyun Cho<sup>\*1,2</sup>**

### Electronic Supplementary Information

Fig. S1. SEM cross-sectional images of TiO<sub>2</sub> films deposited by PECVD at 5 W (left) and 15 W (right).

Fig. S2. High resolution ESCA Ti2p and O spectra of water-modified TiO<sub>2</sub> film under 30 W for 10 min.

Fig. S3. SEM images of an ALA-grafted stent (A-C), an abciximab-grafted stent (D-F), and a heparin-grafted stent (G-I) after in vitro drug-eluting test in a PBS buffer for 1 month, followed by adhesion test in an ultrasonicator.

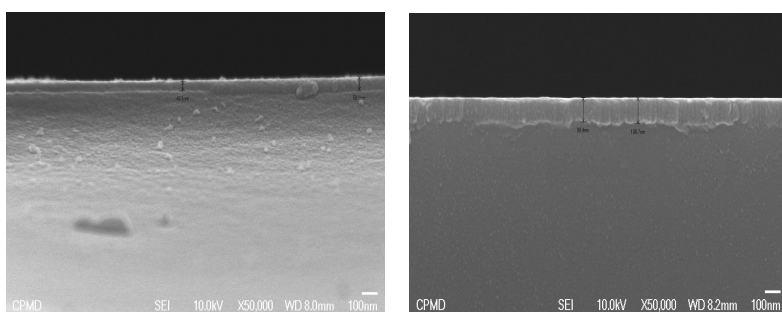

Fig. S1. SEM cross-sectional images of TiO<sub>2</sub> films deposited by PECVD at 5 W (left) and 15 W (right).

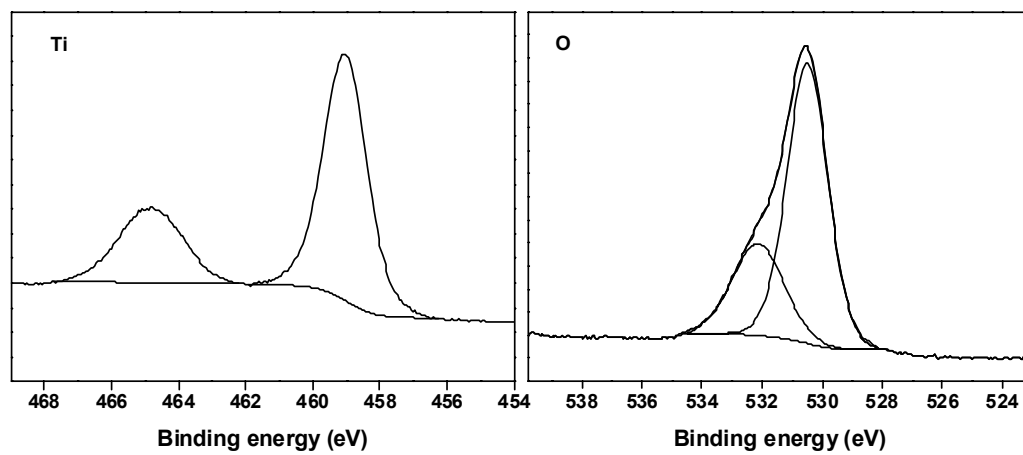

Fig. S2. High resolution ESCA Ti2p and O spectra of water-modified TiO<sub>2</sub> film under 30 W for 10 min.

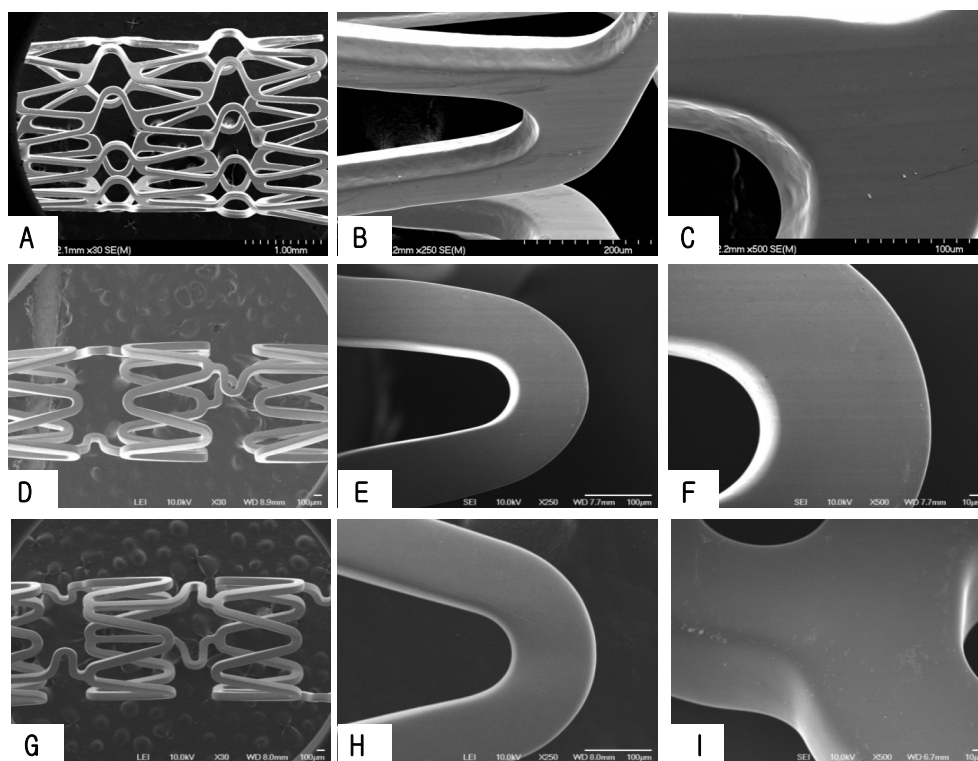

Fig. S3. SEM images of an ALA-grafted stent (A-C), an abciximab-grafted stent (D-F), and a heparin-grafted stent (G-I) after in vitro drug-eluting test in a PBS buffer for 1 month, followed by adhesion test in an ultrasonicator.
